# Supplementary material
Source: PubMed Central journal article supplement (PMC6583585)
Supplement: jama-321-44-s003.pdf [file jama-321-44-s003.pdf]

## Supplementary Online Content

Wang TY, Kaltenbach LA, Cannon CP, et al. Effect of medication co-payment vouchers on P2Y<sub>12</sub> inhibitor use and major adverse cardiovascular events among patients with myocardial infarction: the ARTEMIS randomized clinical trial. *JAMA*. doi:10.1001/jama.2018.19791

**eTable 1.** Hospital Characteristics

**eTable 2.** List of Adjustment Variables for Primary Persistence and MACE Models

**eTable 3.** List of Variables Included in the Propensity Score Model

**eTable 4.** Baseline Patient Characteristics Among Patients Discharged Alive on Ticagrelor or Clopidogrel

**eTable 5.** Persistence and Clinical Outcomes Among the Primary Analysis Population Using 3 Modeling Methods

**eTable 6.** Persistence and Clinical Outcomes Among All Enrolled Patients, Including Patients Discharged on Prasugrel

**eTable 7.** Characteristics of Patients Who Did and Did Not Use the Study Voucher

**eTable 8.** Post Hoc As-Treated Analyses of Medication Persistence, MACE, and Major Bleeding

**eFigure.** Cumulative Incidence Curves for Major Adverse Cardiovascular Events Among Intervention Group Patients With and Without Voucher Use and Usual Care Group Patients

**eAppendix.** List of Enrolling Sites and Corresponding Principal Investigators (in Order of Number Enrolled)

This supplementary material has been provided by the authors to give readers additional information about their work.

**eTable 1.** Hospital Characteristics

|                               | <b>Intervention<br/>(n=135)</b> | <b>Usual Care<br/>(n=166)</b> | <b>P-value</b> |
|-------------------------------|---------------------------------|-------------------------------|----------------|
| Bed size                      | 369 (268, 516)                  | 397 (262, 620)                | 0.30           |
| Teaching hospital             | 22.2%                           | 26.5%                         | 0.36           |
| Geographic region             |                                 |                               | 0.76           |
| Northeast                     | 20.6%                           | 17.3%                         |                |
| Midwest                       | 29.8%                           | 27.5%                         |                |
| South                         | 39.7%                           | 42.3%                         |                |
| West                          | 9.9%                            | 12.8%                         |                |
| Ticagrelor use before ARTEMIS |                                 |                               | 0.63           |
| Low (<15%)                    | 43.7%                           | 41.0%                         |                |
| High (≥15%)                   | 56.3%                           | 59.0%                         |                |
| Annual MI volume              |                                 |                               | 0.70           |
| Low (<400/year)               | 43.0%                           | 45.2%                         |                |
| High (≥400/year)              | 57.0%                           | 54.8%                         |                |

MI, myocardial infarction.

**eTable 2.** List of Adjustment Variables for Primary Persistence and MACE Models

---

Intervention  
Randomization scheme (2:1 vs. 1:1 scheme)  
Interaction between intervention and randomization scheme\*  
Site MI volume  
Site % ticagrelor use  
Age  
Male sex  
Race  
Insurance payors (private vs. non-private)  
Region (Northeast, West, South, vs. Midwest)  
Propensity for intervention

---

\*Included if the interaction term is significant ( $p < 0.05$ )

MACE, major adverse cardiovascular events; MI, myocardial infarction.

**eTable 3.** List of Variables Included in the Propensity Score Model

| <b>Variable</b>                                                                | <b>Variable Type</b>                           |
|--------------------------------------------------------------------------------|------------------------------------------------|
| Randomization scheme                                                           | Categorical (2:1 vs. 1:1 scheme)               |
| Age                                                                            | Continuous                                     |
| Age $\geq 65$ vs. $< 65$ years                                                 | Yes/no                                         |
| Male sex                                                                       | Yes/no                                         |
| Race                                                                           | Categorical (white vs. nonwhite)               |
| Ethnicity                                                                      | Categorical (Hispanic vs. non-Hispanic)        |
| Insurance payors                                                               | Categorical (private vs. non-private)          |
| Prior MI                                                                       | Yes/no                                         |
| Prior PCI                                                                      | Yes/no                                         |
| Prior CABG                                                                     | Yes/no                                         |
| Prior stroke/TIA                                                               | Yes/no                                         |
| Prior heart failure                                                            | Yes/no                                         |
| Dialysis                                                                       | Yes/no                                         |
| PAD                                                                            | Yes/no                                         |
| Hypertension                                                                   | Yes/no                                         |
| Diabetes                                                                       | Yes/no                                         |
| Current/recent smoker                                                          | Yes/no                                         |
| Weight                                                                         | Continuous                                     |
| Transfer in                                                                    | Yes/no                                         |
| STEMI                                                                          | Yes/no                                         |
| Home P2Y <sub>12</sub> inhibitor                                               | Yes/no                                         |
| Home aspirin                                                                   | Yes/no                                         |
| Creatinine clearance                                                           | Continuous                                     |
| Nadir hemoglobin                                                               | Continuous                                     |
| Multivessel disease                                                            | Yes/no                                         |
| Access site                                                                    | Categorical (femoral vs. other)                |
| PCI performed                                                                  | Categorical (multivessel vs. culprit vs. none) |
| CABG performed                                                                 | Yes/no                                         |
| Drug-eluting stent implanted                                                   | Yes/no                                         |
| In-hospital or prior bleeding                                                  | Yes/no                                         |
| In-hospital MI                                                                 | Yes/no                                         |
| In-hospital stroke                                                             | Yes/no                                         |
| Cardiogenic shock (Killip IV on presentation or in-hospital cardiogenic shock) | Yes/no                                         |
| Heart failure (Killip II/III on presentation or in-hospital heart failure)     | Yes/no                                         |
| Cardiac arrest                                                                 | Yes/no                                         |
| Cardiac rehab referral                                                         | Yes/no                                         |
| Health literacy                                                                | Yes/no (score $\geq 10$ vs. $< 10$ )           |
| Baseline angina frequency                                                      | Categorical (100 vs. 70-90 vs. 0-60 points)    |
| Baseline PHQ 2>3                                                               | Categorical                                    |
| Baseline EQ-5D VAS                                                             | Continuous                                     |
| Married                                                                        | Yes/no                                         |
| Employed                                                                       | Yes/no                                         |
| Education (college graduate)                                                   | Yes/no                                         |
| Baseline financial hardship *                                                  | Categorical (1 vs. 2/3 vs. 4/5)                |

**eTable 3 (Continued)**

| <b>Variable</b>                                | <b>Variable Type</b> |
|------------------------------------------------|----------------------|
| Missed >1 dose of medication in the last month | Yes/no               |
| Site: Total bed size                           | Continuous           |
| Site: Teaching status                          | Yes/no               |
| Site: Government hospital                      | Yes/no               |
| Site: Member of a health care network          | Yes/no               |
| Site: Surgery capabilities                     | Yes/no               |

CABG, coronary artery bypass graft; EQ-5D VAS, EuroQol-visual analogue scales; MI, myocardial infarction; PAD, peripheral artery disease; PCI, percutaneous coronary intervention; PHQ, Patient Health Questionnaire; STEMI, ST-segment elevation myocardial infarction; TIA, transient ischemic attack.

\* Baseline financial hardship was asked of all enrolled subjects during the index hospitalization: “On a scale of 1 to 5, how would you rate the financial hardship of your current monthly medication costs?” with 1= no hardship at all, and 5=extreme hardship

**eTable 4.** Baseline Patient Characteristics Among Patients Discharged Alive on Ticagrelor or Clopidogrel

|                                      | <b>Intervention<br/>(n=6135)</b> | <b>Usual Care<br/>(n=3967)</b> |
|--------------------------------------|----------------------------------|--------------------------------|
| <b>Demographics</b>                  |                                  |                                |
| Age, years                           | 62 (54, 70)                      | 62 (54, 70)                    |
| Male                                 | 4193 (68.4%)                     | 2682 (67.6%)                   |
| <b>Race</b>                          |                                  |                                |
| White                                | 5495 (89.6%)                     | 3416 (86.1%)                   |
| African American                     | 544 (8.9%)                       | 461 (11.6%)                    |
| Asian                                | 111 (1.8%)                       | 89 (2.2%)                      |
| American Indian or Alaskan Native    | 59 (1.0%)                        | 58 (1.5%)                      |
| Native Hawaiian or Pacific Islander  | 33 (0.5%)                        | 18 (0.5%)                      |
| Private insurance                    | 3864 (63.0%)                     | 2540 (64.0%)                   |
| College or higher education          | 2906 (47.4%)                     | 2024 (51.0%)                   |
| Employed                             | 2866 (46.7%)                     | 1763 (44.4%)                   |
| <b>Household income</b>              |                                  |                                |
| \$10,000 or less                     | 424 (6.9%)                       | 245 (6.2%)                     |
| \$10,001 to \$20,000                 | 624 (10.2%)                      | 350 (8.8%)                     |
| \$20,001 to \$30,000                 | 644 (10.5%)                      | 397 (10.0%)                    |
| \$30,001 to \$50,000                 | 878 (14.3%)                      | 575 (14.5%)                    |
| \$50,001 to \$70,000                 | 682 (11.1%)                      | 417 (10.5%)                    |
| \$70,001 to \$100,000                | 594 (9.7%)                       | 373 (9.4%)                     |
| \$100,001 to \$150,000               | 384 (6.3%)                       | 279 (7.0%)                     |
| \$150,001 or greater                 | 240 (3.9%)                       | 173 (4.4%)                     |
| I prefer not to answer               | 1665 (27.1%)                     | 1158 (29.2%)                   |
| <b>Medical History</b>               |                                  |                                |
| Prior MI                             | 1201 (19.6%)                     | 859 (21.7%)                    |
| Prior CABG                           | 654 (10.7%)                      | 474 (12.0%)                    |
| Prior stroke/TIA                     | 381 (6.2%)                       | 299 (7.5%)                     |
| Peripheral arterial disease          | 353 (5.8%)                       | 281 (7.1%)                     |
| Diabetes                             | 1936 (31.6%)                     | 1349 (34.0%)                   |
| Hypertension                         | 4141 (67.5%)                     | 2837 (71.5%)                   |
| Current/Recent smoker                | 2068 (33.7%)                     | 1305 (32.9%)                   |
| <b>Admission Characteristics</b>     |                                  |                                |
| STEMI                                | 2845 (46.4%)                     | 1793 (45.2%)                   |
| Weight, kg                           | 89 (77, 103)                     | 89 (76, 104)                   |
| Home aspirin use                     | 2604 (42.4%)                     | 1768 (44.6%)                   |
| Home P2Y <sub>12</sub> inhibitor use | 794 (12.9%)                      | 654 (16.5%)                    |
| Clopidogrel                          | 663 (10.8%)                      | 577 (14.5%)                    |
| Ticagrelor                           | 99 (1.6%)                        | 68 (1.7%)                      |
| Prasugrel                            | 32 (0.5%)                        | 8 (1.7%)                       |
| Creatinine clearance, mL/min         | 71 (53, 90)                      | 69 (52, 87)                    |
| Hemoglobin, g/dL                     | 13.1 (11.7, 14.3)                | 13.0 (11.5, 14.2)              |
| Multivessel disease                  | 2894 (47.2%)                     | 1793 (45.2%)                   |
| <b>Coronary Treatment</b>            |                                  |                                |
| PCI                                  | 5530 (90.1%)                     | 3473 (87.6%)                   |
| CABG                                 | 94 (1.5%)                        | 60 (1.5%)                      |

Continuous variables expressed as median (25<sup>th</sup>, 75<sup>th</sup> percentiles). Categorical variables expressed as n (%).

**eTable 5.** Persistence and Clinical Outcomes Among the Primary Analysis Population Using 3 Modeling Methods

|                         | Primary                |         | Secondary                      |         |                           |         |
|-------------------------|------------------------|---------|--------------------------------|---------|---------------------------|---------|
|                         | Robust Standard Errors |         | Random Intercepts for Hospital |         | Propensity Matched Models |         |
|                         | HR (95% CI)            | P-value | HR (95% CI)                    | P-value | HR (95% CI)               | P-value |
| <b>Persistence</b>      |                        |         |                                |         |                           |         |
| ITT                     | 1.19 (1.02-1.40)       | 0.03    | 1.21 (1.03, 1.41)              | 0.02    | 1.24 (1.09-1.42)          | 0.001   |
| As-treated              | 1.53 (1.29-1.82)       | <0.0001 | 1.53 (1.29, 1.82)              | <0.0001 | 1.54 (1.32-1.80)          | <0.0001 |
| <b>MACE</b>             |                        |         |                                |         |                           |         |
| ITT                     | 1.07 (0.93-1.25)       | 0.35    | 1.06 (0.90-1.25)               | 0.49    | 1.11 (0.95-1.29)          | 0.18    |
| As-treated              | 0.90 (0.76-1.08)       | 0.25    | 0.88 (0.74-1.06)               | 0.17    | 0.88 (0.73-1.05)          | 0.16    |
| <b>Death</b>            |                        |         |                                |         |                           |         |
| ITT                     | 1.11 (0.88-1.39)       | 0.39    | 1.10 (0.86-1.39)               | 0.45    | 1.09 (0.85-1.40)          | 0.49    |
| As-treated              | 0.82 (0.63-1.07)       | 0.14    | 0.81 (0.61-1.07)               | 0.14    | 0.76 (0.55-1.04)          | 0.08    |
| <b>Recurrent MI</b>     |                        |         |                                |         |                           |         |
| ITT                     | 1.08 (0.90-1.29)       | 0.40    | 1.06 (0.87-1.29)               | 0.56    | 1.16 (0.97-1.40)          | 0.11    |
| As-treated              | 0.98 (0.80-1.20)       | 0.83    | 0.96 (0.77-1.19)               | 0.69    | 0.97 (0.78-1.20)          | 0.78    |
| <b>Stroke</b>           |                        |         |                                |         |                           |         |
| ITT                     | 0.98(0.68-1.42)        | 0.91    | 0.98 (0.62-1.54)               | 0.93    | 0.78 (0.44-1.38)          | 0.39    |
| As-treated              | 0.86 (0.57-1.31)       | 0.48    | 0.86 (0.51-1.45)               | 0.57    | 0.90 (0.47-1.72)          | 0.74    |
| <b>CV death</b>         |                        |         |                                |         |                           |         |
| ITT                     | 1.18 (0.92-1.52)       | 0.19    | 1.18 (0.91-1.53)               | 0.22    | 1.16 (0.87-1.53)          | 0.32    |
| As-treated              | 0.89 (0.66-1.21)       | 0.46    | 0.89 (0.64-1.22)               | 0.46    | 0.83 (0.59-1.17)          | 0.29    |
| <b>BARC 2+ bleeding</b> |                        |         |                                |         |                           |         |
| ITT                     | 1.15 (0.94-1.41)       | 0.17    | 1.14 (0.93-1.41)               | 0.22    | 1.23 (0.98-1.54)          | 0.07    |
| As-treated              | 1.13 (0.91- 1.40)      | 0.26    | 1.13 (0.90-1.41)               | 0.29    | 0.96 (0.74-1.24)          | 0.75    |

CI, confidence interval; ITT, intention to treat; MACE, major adverse cardiovascular events; MI, myocardial infarction; HR, hazards ratio. Hazard ratios are presented for all rows except for persistence for which odds ratios are presented.

**eTable 6.** Persistence and Clinical Outcomes Among All Enrolled Patients, Including Patients Discharged on Prasugrel

|                    | Unadjusted   |              |                   |         | Adjusted         |         |
|--------------------|--------------|--------------|-------------------|---------|------------------|---------|
|                    | Intervention | Usual Care   | HR (95% CI)       | P-value | HR (95% CI)      | P-value |
| <b>Persistence</b> |              |              |                   |         |                  |         |
| Patient report     | 5580 (86.9%) | 3837 (84.2%) | 1.26 (1.08-1.47)  | 0.003   | 1.16 (1.00-1.35) | 0.05    |
| Pharmacy fill      | 2925 (54.8%) | 1737 (46.4%) | 1.53 (1.35-1.73)  | <0.0001 | 1.45 (1.29-1.63) | <0.0001 |
|                    |              |              |                   |         |                  |         |
| <b>MACE</b>        | 10.1%        | 10.3%        | 0.99 (0.83-1.18)  | 0.87    | 1.07 (0.93-1.24) | 0.34    |
| Death              | 3.9%         | 3.7%         | 1.05 (0.80-1.37)  | 0.75    | 1.12 (0.89-1.40) | 0.34    |
| Recurrent MI       | 6.9%         | 7.2%         | 0.97 (0.81-1.16)  | 0.73    | 1.07 (0.90-1.27) | 0.43    |
| Stroke             | 0.8%         | 0.9%         | 0.93 (0.63-1.38)  | 0.72    | 1.00 (0.69-1.45) | 0.99    |
| CV death           | 3.0%         | 2.9%         | 1.06 (0.79-1.42)  | 0.70    | 1.15 (0.91-1.46) | 0.24    |
|                    |              |              |                   |         |                  |         |
| BARC 2+ bleeding   | 4.5%         | 4.0%         | 1.07 (0.88, 1.30) | 0.49    | 1.14 (0.94-1.37) | 0.18    |

CI, confidence interval; CV, cardiovascular; MACE, major adverse cardiovascular events; MI, myocardial infarction; HR, hazards ratio. Hazard ratios are presented for all rows except for persistence for which odds ratios are presented.



**eTable 7.** Characteristics of Patients Who Did and Did Not Use the Study Voucher

|                                             | <b>Used Voucher<br/>(n=4393)</b> | <b>Never Used Voucher<br/>(n=1742)</b> |
|---------------------------------------------|----------------------------------|----------------------------------------|
| <b>Demographics</b>                         |                                  |                                        |
| Age, years                                  | 62 (54, 70)                      | 63 (54, 72)                            |
| Male                                        | 3097 (70.50%)                    | 1096 (62.9%)                           |
| Non-white                                   | 360 (8.19%)                      | 280 (16.07%)                           |
| White                                       | 4033 (91.8%)                     | 1462 (83.9%)                           |
| African American                            | 292 (6.7%)                       | 252 (14.5%)                            |
| Asian                                       | 78 (1.8%)                        | 33 (1.9%)                              |
| American Indian or Alaskan Native           | 40 (0.9%)                        | 19 (1.1%)                              |
| Native Hawaiian or Pacific Islander         | 24 (0.6%)                        | 9 (0.5%)                               |
| Private insurance                           | 2987 (67.99 %)                   | 877 (50.34%)                           |
| College or higher education                 | 3807 (76.7%)                     | 1397 (80.2%)                           |
| Employed                                    | 2257 (51.38%)                    | 609 (34.96%)                           |
| <b>Household income</b>                     |                                  |                                        |
| \$10,000 or less                            | 219 (5.0%)                       | 205 (11.8%)                            |
| \$10,001 to \$20,000                        | 376 (8.6%)                       | 248 (14.2%)                            |
| \$20,001 to \$30,000                        | 467 (10.6%)                      | 177 (10.2%)                            |
| \$30,001 to \$50,000                        | 670 (15.3%)                      | 208 (11.9%)                            |
| \$50,001 to \$70,000                        | 526 (12.0%)                      | 156 (9.0%)                             |
| \$70,001 to \$100,000                       | 479 (10.9%)                      | 115 (6.6%)                             |
| \$100,001 to \$150,000                      | 294 (6.7%)                       | 90 (5.2%)                              |
| \$150,001 or greater                        | 187 (4.3%)                       | 53 (3.0%)                              |
| I prefer not to answer                      | 1175 (26.7%)                     | 490 (28.1%)                            |
| <b>Medical History</b>                      |                                  |                                        |
| Prior MI                                    | 784 (17.85%)                     | 417 (23.94%)                           |
| Prior CABG                                  | 409 (9.31%)                      | 245 (14.06%)                           |
| Prior stroke/TIA                            | 222 (5.05%)                      | 159 (9.13%)                            |
| Peripheral arterial disease                 | 200 (4.55%)                      | 153 (8.78%)                            |
| Diabetes                                    | 1256 (28.59%)                    | 680 (39.04%)                           |
| Hypertension                                | 2851 (64.90%)                    | 1290 (74.05%)                          |
| <b>Admission Characteristics</b>            |                                  |                                        |
| STEMI                                       | 2113 (48.10%)                    | 732 (42.02%)                           |
| Weight, kg                                  | 90 (77, 104)                     | 87 (74, 101)                           |
| Home aspirin use                            | 1782 (40.56%)                    | 822 (47.19%)                           |
| Home P2Y <sub>12</sub> inhibitor use        | 431 (9.81%)                      | 363 (20.84%)                           |
| Creatinine clearance, mL/min                | 73 (55, 91)                      | 65 (44, 85)                            |
| Hemoglobin, g/dL                            | 13.2 (12.0, 14.3)                | 12.6 (10.8, 14.0)                      |
| Multivessel disease                         | 2042 (46.48%)                    | 852 (48.91%)                           |
| <b>Coronary Treatment</b>                   |                                  |                                        |
| PCI                                         | 4068 (92.60%)                    | 1462 (83.93%)                          |
| CABG                                        | 49 (1.12%)                       | 45 (2.58%)                             |
| <b>Discharge P2Y<sub>12</sub> Inhibitor</b> |                                  |                                        |
| Clopidogrel                                 | 1252 (28.5%)                     | 1061 (60.9%)                           |
| Ticagrelor                                  | 3141 (71.5%)                     | 681 (39.1%)                            |

Continuous variables expressed as median (25<sup>th</sup>, 75<sup>th</sup> percentiles). Categorical variables expressed as n (%). All p-values <0.01. CABG, coronary artery bypass graft; MI, myocardial infarction; PCI, percutaneous coronary intervention; STEMI, ST-segment elevation myocardial infarction; TIA, transient ischemic attack.

**eTable 8.** Post Hoc As-Treated Analyses of Medication Persistence, MACE, and Major Bleeding

|                                                                                          | Intervention | Usual Care   | Unadjusted                   |                  |         | Adjusted                     |                  |         |
|------------------------------------------------------------------------------------------|--------------|--------------|------------------------------|------------------|---------|------------------------------|------------------|---------|
|                                                                                          |              |              | Observed Difference (95% CI) | OR (95% CI)      | p-value | Adjusted Difference (95% CI) | OR (95% CI)      | p-value |
| <b>Patient-reported P2Y<sub>12</sub> inhibitor persistence</b>                           |              |              |                              |                  |         |                              |                  |         |
| Intention to treat (n=10,102)                                                            | 5340 (87.0%) | 3324 (83.8%) | 3.3% (1.0-5.5)               | 1.31 (1.12-1.54) | 0.001   | 2.3% (0.4-4.1)               | 1.19 (1.02-1.40) | 0.03    |
| As treated (n=8,360)                                                                     | 3956 (90.1%) | 3324 (83.8%) | 6.3% (4.1-8.4)               | 1.79 (1.51-2.12) | <0.0001 | 4.6% (2.7-6.5)               | 1.53 (1.29-1.82) | <0.0001 |
| As treated (filled once) (n=8,211)                                                       | 3956 (90.1%) | 3252 (85.2%) | 4.9% (2.8-7.0)               | 1.60 (1.35-1.89) | <0.0001 | 3.6% (1.8-5.4)               | 1.41 (1.18-1.67) | 0.001   |
| <b>Pharmacy-fill-based P2Y<sub>12</sub> inhibitor persistence</b>                        |              |              |                              |                  |         |                              |                  |         |
| Intention to treat (n=8,373)                                                             | 2820 (55.2%) | 1511 (46.3%) | 8.9% (4.6-13.2)              | 1.56 (1.37-1.77) | <0.0001 | 7.9% (4.4-11.4)              | 1.47 (1.29-1.66) | <0.0001 |
| As treated (n=6,969)                                                                     | 2216 (59.8%) | 1511 (46.3%) | 13.5% (8.7-18.3)             | 1.94 (1.70-2.21) | <0.0001 | 11.8% (7.7-15.8)             | 1.78 (1.55-2.03) | <0.0001 |
| As treated (filled once) (n=6,960)                                                       | 2216 (59.8%) | 1508 (47.1%) | 12.7% (7.9-17.5)             | 1.87 (1.64-2.13) | <0.0001 | 11.2% (7.2-15.3)             | 1.73 (1.52-1.98) | <0.0001 |
| <b>Detectable P2Y<sub>12</sub> inhibitor drug level in randomly selected blood draws</b> |              |              |                              |                  |         |                              |                  |         |
| Intention to treat (n=944)                                                               | 569 (91.8%)  | 284 (87.7%)  | 4.1% (0.1-8.2)               | 1.56 (1.02-2.36) | 0.04    | 5.7% (0.9-10.6)              | 1.86 (1.16-2.98) | 0.01    |
| As treated (n=854)                                                                       | 493 (93.0%)  | 284 (87.7%)  | 5.4% (1.2-9.5)               | 1.84 (1.16-2.93) | 0.01    | 7.3% (2.3-12.2)              | 2.30 (1.38-3.84) | 0.001   |
| As treated (filled once) (n=851)                                                         | 493 (93.0%)  | 284 (88.5%)  | 4.6% (0.3-8.8)               | 1.74 (1.07-2.82) | 0.02    | 6.7% (1.8-11.7)              | 2.21 (1.30-3.74) | 0.003   |
| <b>MACE (death, MI, or stroke)</b>                                                       |              |              |                              |                  |         |                              |                  |         |
| Intention to treat                                                                       | 10.2%        | 10.6%        | -0.5% (-2.2, +1.3)           | 0.96 (0.80-1.15) | 0.65    | +0.7% (-0.7, +2.1)           | 1.07 (0.93-1.25) | 0.35    |
| As treated                                                                               | 7.5%         | 10.6%        | -3.0% (-4.6, -1.5)           | 0.70 (0.58-0.84) | 0.0001  | -0.7% (-2.1, +0.7)           | 0.90 (0.76-1.08) | 0.25    |
| As treated (filled once)                                                                 | 7.5%         | 9.9%         | -2.3% (-3.8, -0.8)           | 0.75 (0.63-0.91) | 0.003   | -0.3% (-1.6, +1.1)           | 0.96 (0.81-1.14) | 0.65    |

eTable 8 (Continued)

|                          | Intervention | Usual Care | Unadjusted                   |                  |         | Adjusted                     |                  |         |
|--------------------------|--------------|------------|------------------------------|------------------|---------|------------------------------|------------------|---------|
|                          |              |            | Observed Difference (95% CI) | OR (95% CI)      | p-value | Adjusted Difference (95% CI) | OR (95% CI)      | p-value |
| <b>BARC 2+ bleeding</b>  |              |            |                              |                  |         |                              |                  |         |
| Intention to treat       | 4.4%         | 4.1%       | +0.3% (-0.6, +1.2)           | 1.06 (0.87-1.30) | 0.56    | +0.6% (-0.3, +1.5)           | 1.15 (0.94-1.41) | 0.17    |
| As treated               | 4.3%         | 4.1%       | +0.1% (-0.8, +1.0)           | 1.00 (0.81-1.23) | 0.95    | +0.6% (-0.3, +1.5)           | 1.13 (0.91-1.40) | 0.26    |
| As treated (filled once) | 4.5%         | 4.5%       | +0.5% (-0.8, +1.0)           | 1.02 (0.82-1.25) | 0.89    | +0.7% (-0.3, +1.6)           | 1.16 (0.93-1.43) | 0.18    |

CI, confidence interval; OR, odds ratio.  
 Primary analysis uses intention to treat approach in which outcomes were compared regardless of whether the intervention group patient used the study voucher. Pre-specified secondary analyses of the as-treated population excluded intervention group patients who never used the study voucher during the 1 year after index MI discharge. Post hoc as-treated (filled once) analysis was performed as voucher use implied at least 1 drug fill for patients in the intervention group, therefore these patients were compared with usual care group patients who filled the prescription at least once.

**eFigure.** Cumulative Incidence Curves for Major Adverse Cardiovascular Events Among Intervention Group Patients With and Without Voucher Use and Usual Care Group Patients

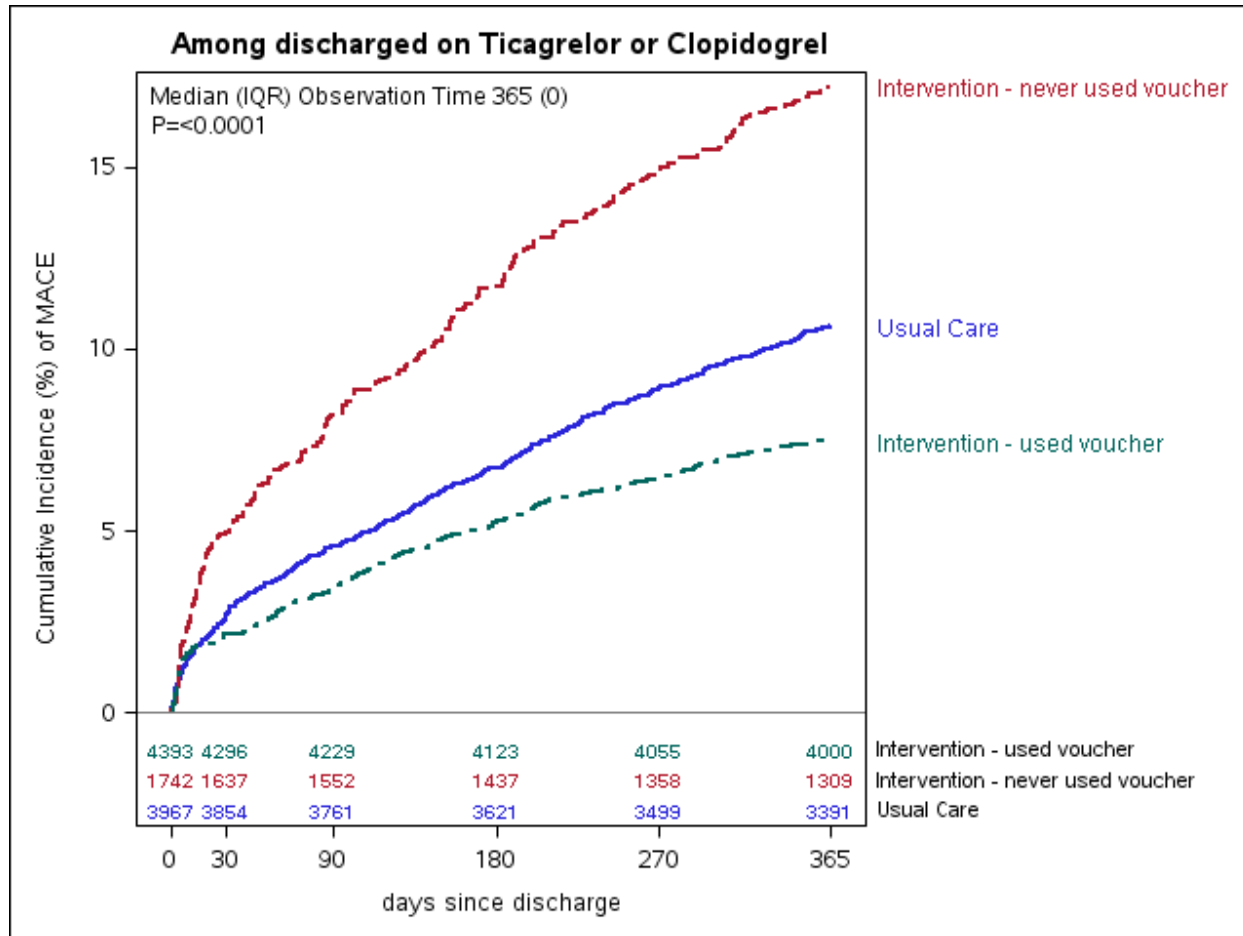

**eAppendix.** List of Enrolling Sites and Corresponding Principal Investigators (in Order of Number Enrolled)

Reid Hospital, Richmond, IN - Zulfiqar Mirza, MD; University of Massachusetts Medical School, Worcester, MA - Nikolaos Kakouros, MD; Regions Hospital, St. Paul, MN - William B. Nelson, MD; Spectrum Health, Grand Rapids, MI - Richard McNamara, MD; Winchester Medical Center, Winchester, VA - Jason Call, MD; Indiana University Health - Bloomington (Premier Healthcare, LLC), Bloomington, IN - Andrew Ferguson, MD; Norton Audubon Hospital (Norton Heart Specialists), Louisville, KY - Vipul Panchal, MD; Vassar Brothers Medical Center (The Heart Center), Poughkeepsie, NY - Louis Kantaros, MD; Mercy Medical Center- Des Moines (Iowa Heart Center), West Des Moines, IA - Mark Tannenbaum, MD; OSF Saint Anthony Medical Center (Rockford Cardiovascular Associates), Rockford, IL - Asad Sheikh, MD; Minneapolis Heart Institute Foundation, Minneapolis, MN - M. Nicholas Burke, MD; St. Joseph's Medical Center, Stockton, CA - Sujeeth Punnam, MD; Peninsula Regional Medical Center (Delmarva Heart Research Foundation, Inc), Salisbury, MD - Steven Hearne, MD; University of Vermont Medical Center, Burlington, VT - Prospero Gogo, MD; INTEGRIS Baptist Medical Center, Inc., Oklahoma City, OK - Jeffery Sparling, MD; Lakeland Regional Medical Center (Great Lakes Heart & Vascular Institute), St. Joseph, MI - Thomas Pow, MD; Carilion Medical Center, Roanoke, VA - Mohd Mirza, MD; Missouri Baptist Medical Center, St. Louis, MO - Stuart Higano, M.D.; Yale University, New Haven, CT - Robert Attaran, MD; McLaren Northern Michigan Hospital, Petoskey, MI - Gerald Gadowski, MD; Duke University Medical Center, Durham, NC - Tracy Wang, MD; St. Mary's Medical Center (Essentia Health), Duluth, MN - Jason Schultz, MD; Methodist University Hospital, Memphis, TN - Rami Khouzam, MD; Stony Brook University Hospital (Stony Brook Medicine), Stony Brook, NY - William Lawson, ; St. Cloud Hospital (CentraCare Heart and Vascular Center), St. Cloud, MN - Bernard Erickson, MD; Palomar Medical Center (Arch Health Partners), Escondido, CA - Hamed Bayat, MD; Geisinger Medical Center - Geisinger Health, Danville, PA - James Blankenship, MD; Providence Sacred Heart Medical Center and Children's Hospital, Spokane, WA - Bryan Fuhs, MD; Lehigh Valley Hospital, Allentown, PA - James Burke, MD; Lancaster General Hospital, Lancaster, PA - Rupal Dumasia, MD; Ellis Hospital (Cardiology Associates of Schenectady P.C.), Schenectady, NY - Steven Weitz, MD; Rush Copley Medical Center (Fox Valley Clinical Research Center, LLC), Aurora, IL - Basharat Muneer, MD; St. Charles Medical Center - Bend (St. Charles Health System), Bend, OR - Bruce McLellan, MD; Wake Med Health and Hospitals, Raleigh, NC - Pratik Desai, MD; West Tennessee Healthcare, Jackson, TN - Henry Lui, MD; Methodist Medical Center (Parkway Cardiology Associates, PC), Oak Ridge, TN - L Todd Justice, MD; Robert Packer Hospital (Donald Guthrie Foundation), Sayre, PA - Edo Kaluski, MD; York Hospital, York, PA - Paul Tolerico, MD; Carle Foundation Hospital, Urbana, IL - Sanjay Mehta, MD; Huntington Memorial Hospital, Pasadena, CA - Raul Fernando Roth, MD; Medical Center Navicent Health (formerly Medical Center of Central Georgia), Macon, GA - Mark Dorogy, MD; Shady Grove Medical Center (Adventist HealthCare), Rockville, MD - Geetha Pinto, MD; United Heart and Vascular Clinic (Allina Health), St. Paul, MN - Kenneth Baran, MD; Beth Israel Deaconess Medical Center, Boston, MA - Eli Gelfand, MD; Ball Memorial Hospital (IU Health), Muncie, IN - Michael Moran, MD; Gundersen Lutheran Medical Center (Gundersen Health System), La Crosse, WI - Sampooranima Setty, MD FACC; Mayo Clinic Health System - Franciscan Healthcare, La Crosse, WI - S. Michael Gharacholou, MD; CaroMont Regional Medical Center (CaroMont Heart), Gastonia, NC - Dustin Letts, MD; University of Iowa Hospitals and Clinics, Iowa City, IA - Phillip Horwitz, MD; Jewish Hospital, Louisville, KY - Lorrel Brown, MD; Aurora St. Luke's Medical Center, Milwaukee, WI - Anthony DeFranco, MD; University of Colorado Hospital, Aurora, CO - John Messenger, MD; UNC Regional Physicians Carolina Cardiology, High Point, NC - Steven Rohrbeck, MD; Washington Regional Medical Center, Fayetteville, AR - Joel Carver, M.D.; Memorial Hospital of South Bend, South Bend, IN - Shakil Aslam, MD; Northside Hospital, Atlanta, GA - Jack Chen, MD, FACC, FSCAI; Saint Dominic Hospital (Jackson Cardiology Associates), Jackson, MS - Harsha Nagarajarao, MD; Robert Wood Johnson University Hospital - Somerset, Somerville, NJ - Sharan Mahal, MD, FACC; Doylestown Hospital, Doylestown, PA - Steven Guidera,

MD; The Valley Hospital, Ridgewood, NJ - Janet Strain, MD; Springhill Memorial Hospital (Cardiology Associates of Mobile, Inc), Mobile, AL - Jason Cole, MD; Alaska Heart Institute, Anchorage, AK - Seth Krauss, MD; Suburban Hospital - NIH Heart Center, Bethesda, MD - Gregory Kumkumian, MD; AtlantiCare Regional Medical Center, Pomona, NJ - Mayuri Patel, MD; Lexington Medical Center (Lexington Cardiology), West Columbia, SC - Robert Malanuk, MD; Community Heart and Vascular Hospital (Community Health Network, Inc. d/b/a a facility of Community Hospital East), Indianapolis, IN - Jennifer Sams, MD; Holy Name Medical Center, Teaneck, NJ - Angel Mulkay, MD; Mission Health System (Asheville Cardiology Associates), Asheville, NC - D. Michael Unks, MD; Sinai Hospital of Baltimore, Baltimore, MD - Mauro Moscucci, MD, MBA; Huntsville Hospital (Heart Center Research, LLC), Huntsville, AL - Vernon Ross Hunter, MD; Southeastern Regional Medical Center, Lumberton, NC - Christopher Walters, MD; St. Johns Hospital (Prairie Education & Research Cooperative), Springfield, IL - Frank Mikell, MD; St. Clare Health Center, Fenton, MO - Anish Thomas, MD; McLaren Macomb, Mount Clemens, MI - Mark Zainea, MD; Aultman Hospital, Canton, OH - Brendan Duffy, MD; Pinehurst Medical Clinic/FirstHealth Moore Regional Hospital, Pinehurst, NC - Patrick (PJ) Simpson, MD; St. Joseph Health Center, St. Charles, MO - Mark Taber, MD; Sacred Heart Hospital Pensacola, Pensacola, FL - Rohit Amin, MD; Renown Regional Medical Center, Reno, NV - Chanwit Roongsritong, MD; Lourdes Cardiology Services, Voorhees, NJ - Ian Joffe, MD; Tallahassee Research Institute, Tallahassee, FL - Wayne Batchelor, MD; MultiCare Institute for Research and Innovation (Cardiac Study Center), Puyallup, WA - Vinay Malhotra, MD; McLaren Flint, Flint, MI - Syed Ahmed, MD; Providence Health Center, Waco, TX - Charles Shoultz III, MD, FACC; Billings Clinic Hospital (Billings Clinic), Billings, MT - Brian Rah, MD; Geisinger Wyoming Valley, Wilkes-Barre, PA - Kishore Harjai, MD; New Hanover Regional Medical Center, Wilmington, NC - William Smith, MD; University of Alabama at Birmingham, Birmingham, AL - Vera Bittner, MD; Bryan Medical Center (Bryan Heart), Lincoln, NE - Robert Hibbard, MD; Holy Spirit Hospital (Spirit Physician Services INC dba Holy Spirit Medical Group), Camp Hill, PA - Andreas Wali, MD, FACC, FSCAI; Queen's Medical Center, Honolulu, HI - Michael Brodsky, MD; Arkansas Heart Hospital (Arkansas Site Management Services), Little Rock, AR - David Mego, MD; Covenant Medical Center, Inc., Saginaw, MI - Manoj Sharma, MD; Anne Arundle Health System Research Institute, Annapolis, MD - James Welker, DO; Centra Stroobants Cardiovascular Center, Lynchburg, VA - Fadi El-Ahdab, MD; Saint Luke's Hospital, Kansas City, MO - Adnan Chhatriwalla, MD; St. Mary's Medical Center (Kansas City Cardiology), Blue Springs, MO - Michael Liston, MD; Memorial Hospital (Advanced Heart Care), Belleville, IL - Omar Almousalli, MD; Baptist Medical Center Jacksonville (Baptist Heart Specialists), Jacksonville, FL - Ashwini Davuluri, MD; Chambersburg Hospital, Chambersburg, PA - Aylmer Tang, MD; Saint Francis Medical Center (OSF Healthcare Cardiovascular Institute, Peoria, IL - Sudhir Mungee, MD; Virginia Cardiovascular Specialists, Richmond, VA - Shelton Thomas, MD; Sentara Norfolk General Hospital (Sentara Cardiovascular Research Institute), Norfolk, VA - Scott Robertson, MD; Norton Brownsboro Hospital (Norton Heart Specialists), Louisville, KY - Vipul Panchal, MD; Memorial Healthcare System, Hollywood, FL - Johnathon Roberts, MD; Providence Hospital (Providence Cardiology LLC), Columbia, SC - Bashir Lone, MD; Baptist Memorial Hospital - Memphis (Baptist Clinical Research Institute), Memphis, TN - Frank McGrew, MD; Allegheny General- Cardiovascular Institute, Pittsburgh, PA - Ramzi Khalil, MD; University Community Hospital Inc dba Florida Hospital Tampa, Tampa, FL - Charles Lambert, MD, PhD; Loma Linda University Health, Loma Linda, CA - Anthony Hilliard, MD; Fountain Valley Regional Hospital and Medical Center (California Heart Specialist), Huntington Beach, CA - Majed Chane, MD; Bassett Medical Center (Bassett Healthcare Network), Cooperstown, NY - Dhananjai Menzies, MD; Memorial Hospital, York, PA - Manu Rajachandran, MD; AnMed Health, Anderson, SC - Brent McLaurin, MD; Legacy Meridian Park Medical Center (Legacy Research Institute), Portland, OR - Eli Rosenthal, MD; Carr Cardiology, Oceanside, CA - Kenneth Carr, MD; St. John Hospital & Medical Center, Detroit, MI - Thomas Lalonde, MD; Northeast Arkansas Baptist Memorial Hospital (NEA Baptist Clinic), Jonesboro, AR - Dharmendra Patel, MD; UW Medicine Valley Medical Center- (Southlake Research), Renton,, WA - Sumeet Subherwal, MD; University of Chicago Medical Center, Chicago, IL - Jonathan Paul, MD; Cedars Sinai Medical Center, Los Angeles, CA - Timothy

Henry, MD; Baylor Scott & White Health, Round Rock, TX - Vijay Divakaran, MD; St. Mary's Health Center, St. Louis, MO - Manoj Eapen, MD; St. Anthony's Medical Center, St. Louis, MO - Charles Carey, MD; University of Michigan, Ann Arbor, MI - P. Michael Grossman, MD; Los Robles Hospital & Medical Center, Thousand Oaks, CA - Shahrzad Shareghi, MD; St. Peter's Hospital (Albany Associates in Cardiology a division of St Peter's Health Care Partners Medical Associates, PC), Albany, NY - Robert Phang, MD; University Hospitals of Cleveland, Cleveland, OH - Sri Krishna Madan Mohan, MD; Baptist Health Lexington, Lexington, KY - Michael Jones, MD; Hillcrest Medical Center (Oklahoma Heart Institute), Tulsa, OK - Wayne Leimbach, MD; University of Virginia Health System, Charlottesville, VA - Lawrence Gimple, MD; Richmond University Medical Center, Staten Island, NY - Dennis Bloomfield, MD; Methodist Texsan Hospital (South Texas Cardiovascular Consultants, PLLC), San Antonio, TX - Jose Perez, MD; Bellin Memorial Hospital, Inc. d/b/a/ Cardiology Associates of Bellin Health, Green Bay, WI - James Rider, MD; Bay Regional Medical Center d/b/a McLaren Bay Region, Bay City, MI - Daniel Lee, MD; The Danbury Hospital (Western Connecticut Health Network), Danbury, CT - Hal Wasserman, MD; Jackson Madison County General Hospital (The Jackson Clinic, PA), Jackson, TN - James Crenshaw, MD; Englewood Hospital and Medical Center, Englewood, NJ - Richard Goldweit, MD; Altru Health System, Grand Forks, ND - Rebeea Aboufakher, MD; Univ. of Texas/Memorial Hermann Hospital, Houston, TX - H. Vernon Anderson, MD; Medical University of South Carolina, Charleston, SC - Thomas Todoran, MD; ProMedica Toledo Hospital, Toledo, OH - Adil Karamali, MD; Wheaton Franciscan Healthcare-All Saints, Racine, WI - James Tierney, MD; Torrance Memorial Medical Center, Torrance, CA - Mark Lurie, MD; Southwest General Health Center, Middleburg Heights, OH - Trilok Sharma, MD; Presence Saint Joseph Medical Center, Joliet, IL - Govind Ramadurai, MD; Rapid City Regional Hospital (Black Hills Cardiovascular Research), Rapid City, SD - Norman Ferrier, MD; University of Pittsburgh Medical Center - Shadyside Hospital, Pittsburgh, PA - Sushant Sharma, MD; Franciscan Physician Network - Indiana Heart Physicians, Indianapolis, IN - Harry Genovely, MD; St. Luke's Hospital Association, Duluth, MN - Scott Mikesell, DO; Athens Regional Medical Center (Athens Regional Cardiology Group), Athens, GA - Kent Nilsson, MD; Icahn School of Medicine at Mount Sinai, New York, NY - Jeffrey Bander, MD; St. Joseph Mercy Oakland, Pontiac, MI - Michele DeGregorio, MD; Johns Hopkins University, Columbia, MD - William Herzog, MD; Kettering Medical Center, Kettering, OH - Franklin Handel, MD; St. Elizabeth Medical Center, Utica, NY - RaKesh Bhan, MD; Genesys Regional Medical Center, Grand Blanc, MI - David Dobies, MD; Shands University of Florida, Gainesville, FL - David Anderson, MD; Drexel University, Philadelphia, PA - Howard Eisen, MD; Kootenai Health (Kootenai Heart Clinics, LLC), Coeur d' Alene, ID - Marek Janout, MD; Saint Mary's Regional Medical Center, Reno, NV - Devang Desai, MD; Centura Health- Penrose St. Francis Health Services, Colorado Springs, CO - Chris Kim, MD; Forrest County General Hospital (Hattiesburg Clinic, P.A.), Hattiesburg, MS - Craig Thieling, MD; St. Joseph Medical Center (Kansas City Cardiology), Kansas City, MO - Michael Liston, MD; Sarasota Memorial Hospital (Intercoastal Medical Group), Sarasota, FL - Ricardo Yaryura, MD; Palestine Regional Medical Center (Grace Research, LLC), Palestine, TX - Gaurav Aggarwala, MD; Lakeland Regional Medical Center (Watson Clinic Center for Research, Inc.), Lakeland, FL - Kevin Browne, MD; Tennova Healthcare- Turkey Creek Medical Center, Knoxville, TN - Malcolm Foster, MD; Baylor Scott & White Health, Temple, TX - Jeffrey Michel, MD; The Heart Hospital Baylor Plano, Plano, TX - David Brown, MD; North Kansas City Hospital, North Kansas City, MO - Zafir Hawa, MD; Wake Forest Baptist Health, Winston-Salem, NC - Michael Kutcher, MD; Herman Clinical Research, LLC, Suwanee, GA - Lee Herman, MD; Boston Medical Center, Boston, MA - Alice Jacobs, MD; The Medical Center of Aurora (Aurora Denver Cardiology Associates), Aurora, CO - John Ord, MD; Nebraska Heart Hospital (Nebraska Heart Institute), Lincoln, NE - Omar Nass, MD; Henrico Doctors' Hospital, Richmond, VA - Minh Bui, MD; Palmetto Heart/Health Systems-Palmetto Richland Hospital, Columbia, SC - Jonathan (J) Hewett, MD; Rochester General Hospital - Guide Star Clinical, Rochester, NY - Jeremiah Depta, MD; Rex Hospital, Raleigh, NC - Mohit Pasi, MD; Oklahoma Heart Hospital Research Foundation, Oklahoma City, OK - Thomas McGarry, MD; Medicor Cardiology, PA, Bridgewater, NJ - Jason Hall, MD; Baptist Hospital (Langhorne Cardiology Consultants, Inc.), Pensacola, FL - G. Ramon Aycock, MD; North Atlanta Heart

& Vascular Center P.C. (Northside Hospital Forsyth), Cumming, GA - Bhaskar Reddy, MD, FACC; Verde Valley Medical Center, Cottonwood, AZ - Samuel Butman, MD; Christus Santa Rosa New Braunfels, New Braunfels, TX - Jamison Wyatt, MD; St. Joseph's Hospital (Comprehensive Research Inst.), Tampa, FL - Saihari Sadanandan, MD; Winter Haven Hospital, Winter Haven, FL - Kollagunta Chandrasekhar, MD; St. Agnes Hospital (Maryland Cardiovascular Specialists), Baltimore, MD - Kabir Yousuf, MD; CHI Health Bergan Mercy Medical Center (CHI Health Research Center), Omaha, NE - Jeffrey Carstens, MD; Washington University School of Medicine, St. Louis, MO - Richard Bach, MD; Salinas Valley Memorial Hospital (Salinas Valley Memorial Healthcare System), Salinas, CA - Robert Wlodarczyk, MD; St. Vincent's Medical Center- Southside, Jacksonville, FL - Peter Kuhlman, MD; Providence-Providence Park Hospital, Southfield, MI - Souheil Saba, MD; Our Lady of Lourdes Medical Center (Cardiovascular Associates of the Delaware Valley), Haddon Heights, NJ - Vijayendra Verma, MD; Maricopa Medical Center, Phoenix, AZ - Mehrdad Saririan, MD; Ochsner Medical Center (Ochsner Clinic Foundation), New Orleans, LA - Marc Effron, MD; Stamford Hospital, Stamford, CT - David Hsi, MD; Christian Hospital (St. Louis Heart and Vascular), St. Louis, MO - George Kichura, MD; Cardiovascular Institute of Northwest Florida, Panama City, FL - Michael Morrow, MD; Kent Hospital, Warwick, RI - Chester Hedgepeth, MD, PhD; St. Vincent Hospital and Health Care Centers, Inc, Indianapolis, IN - Gregory Elsner, MD; Florida Hospital (Adventist Health System), Orlando, FL - Hani Seifein, MD, FACC; UHS Wilson Medical Center, Johnson City, NY - Afzal Rehman, MD, PhD; HealthEast St. Joseph's Hospital, St. Paul, MN - Carmelo Panetta, MD; Genesis Medical Center, Davenport, IA - Eric Dippel, MD; Legacy Good Samaritan Medical Center (Legacy Research Institute), Portland, OR - Eli Rosenthal, MD; MedStar Southern Maryland Hospital Center, Clinton, MD - Mun Hong, MD; Waukesha Memorial Hospital (ProHealth Care, Inc.), Waukesha, WI - Lisa Schmitz, DO; Norton Hospital (Norton Heart Specialists), Louisville, KY - Vipul Panchal, MD; Rapides Regional Medical Center (Alexandria Cardiology Clinic), Alexandria, LA - Naseem Jaffrani, MD; Westchester Medical Center -New York Medical College, Valhalla, NY - Robert Timmermans, MD; Medical College of Wisconsin and Froedtert Hospital, Milwaukee, WI - Nicole Lohr, MD; Memorial Hospital of Jacksonville (First Coast Cardiovascular Institute), Jacksonville, FL - Sumant Lamba, MD; Guadalupe Regional Medical Center, Seguin, TX - Jamison Wyatt, MD; Wellspan HEALTH- Ephrata, Ephrata, PA - Paul Tolerico, MD; DLP Marquette General Hospital (UP Health Systems - Marquette), Marquette, MI - John Pap, MD; DePaul Health Center, Bridgeton, MO - Ardaman Nanda, MD; University of Cincinnati, Cincinnati, OH - Charles Hattemer, MD; Cape Cod Research Institute (Cape Cod Hospital), Hyannis, MA - Richard Zelman, MD; Georgia Regents Medical Center (Georgia Regents University), Augusta, GA - Vishal Arora, MD; Saint Michael's Medical Center - New Jersey, Newark, NJ - Abbas Shehadeh, MD; Riverside Medical Center, Riverside, CA - Patrick Hu, MD; Mercy Rockford Health System (Rockford Health Physicians), Rockford, IL - Ebert Caceres, MD; Roper Saint Francis Healthcare/Low Country Cardiology, Charleston, SC - Scott Woodfield, MD; Largo Medical Center - The Heart Institute at Largo, Largo, FL - Jesse Klein, DO; Geisinger Community Medical Center, Scranton, PA - Stephen Voyce, MD, FACC, FACP; Ocala Regional Medical Center (Ocala Research Institute), Ocala, FL - Rakesh Prashad, MD; Advanced Research Associates, Hodges, SC - Priya Kumar, MD; Community Hospital of Munster, Munster, IN - Wail Asfour, MD; Centura Health- St. Anthony Hospital, Lakewood, CO - John Altman, MD; John H. Stroger Jr., Hospital of Cook County, Chicago, IL - Rami Doukky, MD; Cooper University Hospital (Cardiovascular Associates of the Delaware Valley), Haddon Heights, NJ - Georges Kaddissi, MD; Alpena Regional Hospital (Endeavor Medical Research), Alpena, MI - Abraham Salacata, MD; Coliseum Medical Center, Macon, GA - Maria Bartlett, MD; Menorah Medical Center (Midwest Heart and Vascular Specialists), Overland Park, KS - Stephen Bloom, MD; Morton Plant Mease Health Care, Inc (Baycare Medical Group), Clearwater, FL - Parag Patel, MD; Abington Memorial Hospital, Abington, PA - Bruce Klugherz, MD; Halifax Health Medical Center (Daytona Heart Group), Daytona Beach, FL - Vance Wilson, MD; Reading Hospital- Clinical Trials, West Reading, PA - Eric Elgin, MD; Steward St. Elizabeth's Medical Center of Boston, Brighton, MA - Faisal Khan, MD; Hunterdon Medical Center (Hunterdon Cardiovascular Associates), Flemington, NJ - Andrew Rudnick, MD; University of Louisville Hospital, Louisville, KY - Lorrel Brown, MD; Sparks Regional Medical Center, Fort Smith, AR - Robert



Parris, MD; Columbia St. Mary's Hospital, Milwaukee, WI - Joshua Liberman, MD; Willis Knighton Medical Center (Grace Research, LLC), Bossier City, LA - William Eaves, MD; WILLIS KNIGHTON MEDICAL CENTER INC-NORTH. CRNA GROUP (Advanced Cardiovascular Specialists), Shreveport, LA - James Smith, MD; CHI - Creighton University Medical Center, Omaha, NE - Jeffrey Carstens, MD; St. Joseph's Regional Medical Center, Paterson, NJ - Mahesh Bikina, MD; Northridge Hospital Medical Center, Northridge, CA - Mehrdad Ariani, MD; Ronald Reagan UCLA Medical Center, Los Angeles, CA - Eric Yang, MD; Grady Health, SE Atlanta, GA - Elizabeth Ofili, MD; Baptist South Hospital - Baptist Health Research Institute, Jacksonville, FL - Bharat Gummadi, MD; Professional Healthcare of Pinellas, Inc, St. Petersburg, FL - Fadi Saba, MD; Northside Hospital, St Petersburg, FL - Andrew Rosenthal, MD; Methodist South Hospital, Memphis, TN - Rami Khouzam, MD; Carteret Medical Group, Morehead City, NC - Michael Rave, MD; Baptist Medical Center Beaches (Baptist Health Research Institute), Jacksonville Beach, FL - Ruple Galani, MD; Gwinnett Medical Center, Lawrenceville, GA - Yuri Pride, MD-ACS; Porter Regional Hospital (Porter Physician Services LLC DBA NICKP), Valparaiso, IN - Keith Atassi, MD; Mercy Hospital Joplin, Joplin, MO - William R. Craig, MD; St. Joseph Hospital West, St. Louis, MO - Sam Bishara, MD; Manatee Memorial Hospital, Bradenton, FL - S. Jay Mathews, MD; St. Vincent Medical Center - Riverside, Jacksonville, FL - Samer Garas, MD; WellStar Research Institute, Marietta, GA - George Kramer, MD; Henry Ford Health System, Detroit, MI - Khaled Abdul-Nour, MD; University of South Alabama, Mobile, AL - Ghulam Mustafa Awan, MD; Bridgeport Hospital, Bridgeport, CT - Edward Tuohy, MD; Houston Methodist Sugar Land Hospital, Sugar Land, TX - Byron Ellis, MD; Grand View Hospital (Grand View - Lehigh Valley Health Services, Buxmont Cardiology Division), Sellersville, PA - Paul Hermany, MD; Good Samaritan Hospital, Dayton, OH - Sudhkar Maraboyina, MD; The Nebraska Medical Center (University of Nebraska), Omaha, NE - Gregory Pavlides, MD; Bethesda Hospital East - Daniel Heart & Vascular Center, Boynton Beach, FL - George Daniel, MD, FACC; Baylor Medical Center McKinney (Baylor Health), McKinney, TX - David Brown, MD; Mercy Hospital, Miami, FL - Manual Mayor, MD; Bay Front Health, St. Petersburg Research, St Petersburg, FL - Ravikiran Korabathina, MD, MPH; Virtua Memorial Hospital (Virtua The Cardiology Group), Moorestown, NJ - Thomas Galski, DO; Flagstaff Medical Center, Flagstaff, AZ - Omar Wani, MD; University Medical Center of Southern Nevada, Las Vegas, NV - Chowdhury Ahsan, MD; Nova Clinical Research, LLC, Bradenton, FL - Christopher Davis, MD; Florida Cardiology Group, Hudson, FL - Gopal Chalavarya, MD; Bay Area Total Health, Webster, TX - Pamela Dugano-Daphnis, MD; Hospital Menonita de Cayey (Caguas Cardio Center), Caguas, PR - Pedro J. Colon Hernandez, MD; Penobscot Bay Medical Center, Rockport, ME - Christopher Gelwix, MD; Saint John Macomb Oakland Hospital-Providence Health, Warren, MI - SRINIVAS KONERU, MD; Ruby Memorial Hospital - WVU Heart Institute, Morgantown, WV - Jason Moreland, MD; Texas Health - Presbyterian Hospital of Dallas, Dallas, TX - Carter King, MD; Olympia Medical Center (MACKS Research Group, Inc.), Beverly Hills, CA - Ramprasad Dandillaya, MD; South Miami Hospital (Pharma Research International, Inc), Miami, FL - Jorge Cuello, MD; Sacred Heart Hospital on the Emerald Coast (Sacred Heart Medical Group - Cardiology), Miramar Beach, FL - Stephen Phlaum, MD; Freeman Hospital (Freeman Health System), Joplin, MO - William John Nicholas, MD; Humble Surgical Hospital (Houston Heart and Vascular Associates), Humble, TX - Raymond Little, MD; Oakwood Hospital - Dearborn (Oakwood Healthcare Inc.), Dearborn, MI - George Nahhas, MD; Pish Medical Associates, Inc.(Union Town Hospital), Uniontown, PA - Richard Pish, MD; Cardiovascular Consultants Heart Center, Fresno, CA - Michael Gen, MD; Atlanta Medical Center (Primary Care Specialist), Atlanta, GA - Courtney Shelton, MD; Broward Health Medical Center, Ft. Lauderdale, FL - Arnoux Blanchard, MD; Clara Maass Medical Center-Barnabas Health, Belleville, NJ - ELIE CHAKHTOURA, MD; Centinela Hospital Medical Center, Inglewood, CA - Ali Meibodi, MD; North Hills Medical Research, Inc, North Richland Hills, TX - John Gabriel, MD; Community Clinical Research Center, Anderson, IN - Preetham Jetty, MD
