# Supplementary material
Source: PubMed Central journal article supplement (PMC6583585)
Supplement: jama-321-44-s004.pdf [file jama-321-44-s004.pdf]

Wang TY, Kaltenbach LA, Cannon CP, et al. Effect of medication co-payment vouchers on P2Y<sub>12</sub> inhibitor use and major adverse cardiovascular events among patients with myocardial infarction: the ARTEMIS randomized clinical trial. *JAMA*. doi:10.1001/jama.2018.19791

## **Data Sharing Statement**

### **Data**

**Data available:** No
